# Supplementary material for: A highly selective ratiometric fluorescent probe for biothiol and imaging in live cells
Source: Royal Society of Chemistry journal article supplement (doi:10.1039/c6ra04564b), 2016-01-01
Supplement: c6ra04564b1.pdf [file c6ra04564b1.pdf]

Supporting Information

## **A Highly Selective Ratiometric Fluorescent Probe for Biothiol and Imaging in Live Cells**

**Baozhen Gao<sup>a</sup>, Lixia Cui<sup>a</sup>, Yong Pan<sup>b</sup>, Guomei Zhang<sup>a</sup>, Ying Zhou<sup>a</sup>, Caihong  
Zhang<sup>a,\*</sup>, Shaomin Shuang<sup>a</sup>, Chuan Dong<sup>a,\*</sup>**

Table of Contents:

1. <sup>1</sup>H NMR, <sup>13</sup>CNMR and MS spectra of probe.
2. <sup>1</sup>H NMR of N-butyl-4-amino-1,8-naphthalimide.
3. Ratiometric responses towards Cys
4. Ratiometric responses towards Hcy
5. Time-dependent fluorescence spectral changes of probe with biothiols.
6. The effects of pH.
7. Determination of quantum yield
8. References

---

\*Corresponding authors: E-mail: [chzhang@sxu.edu.cn](mailto:chzhang@sxu.edu.cn) (C. Zhang); Tel: +86 351 7010588; Fax: +86 351 7018613

\*Corresponding authors: E-mail: [dc@sxu.edu.cn](mailto:dc@sxu.edu.cn) (C. Dong); Tel: +86 351 7010588; Fax: +86 351 7018613

# 1. $^1\text{H}$ NMR, $^{13}\text{C}$ NMR and MS spectra of probe

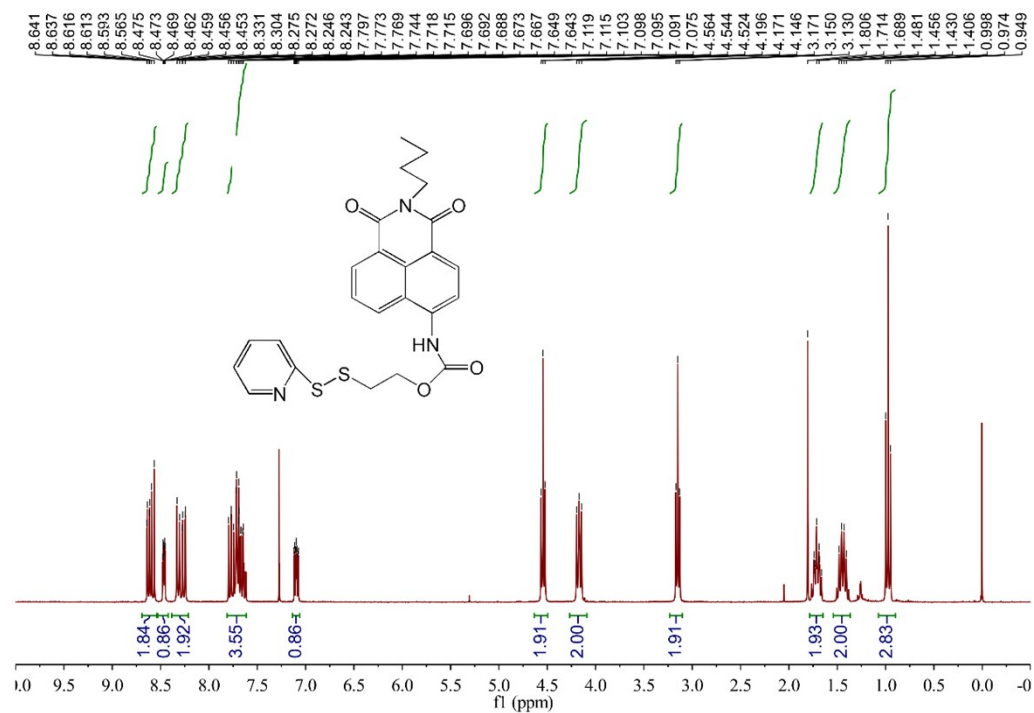

Fig.S1(a) The  $^1\text{H}$  NMR spectrum of probe.

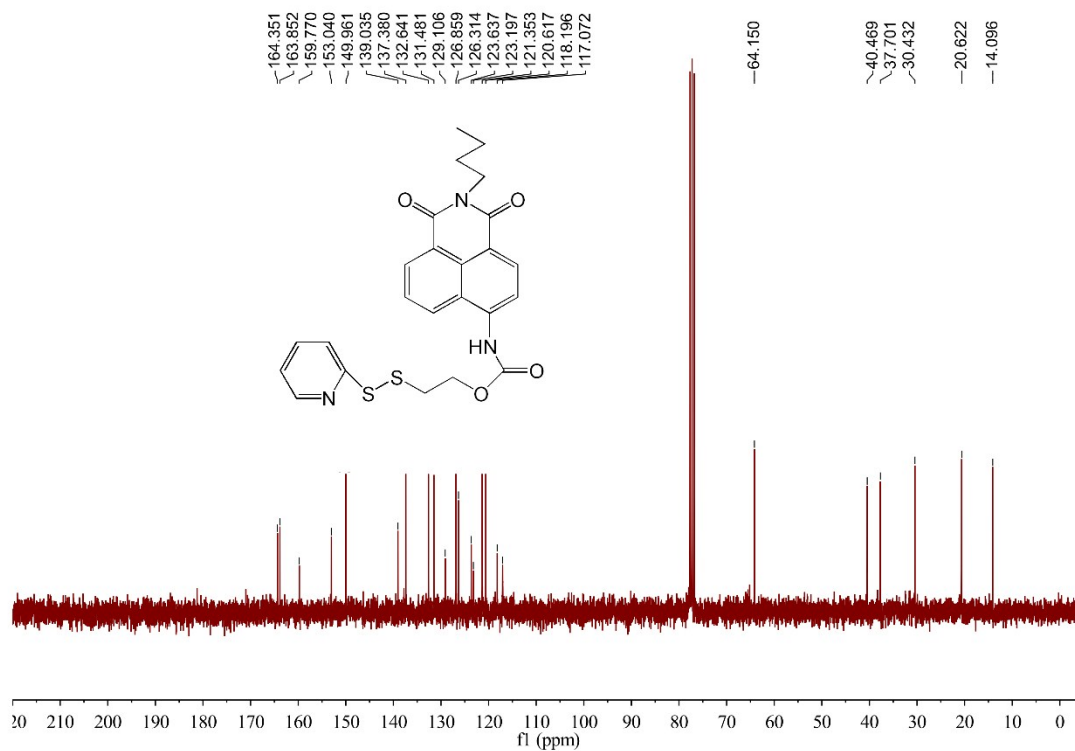

Fig.S1(b) The  $^{13}\text{C}$  NMR spectrum of probe.

## Spectrum Report

Final - Shots 400 - CLEAN Dec3 2014; Label B1

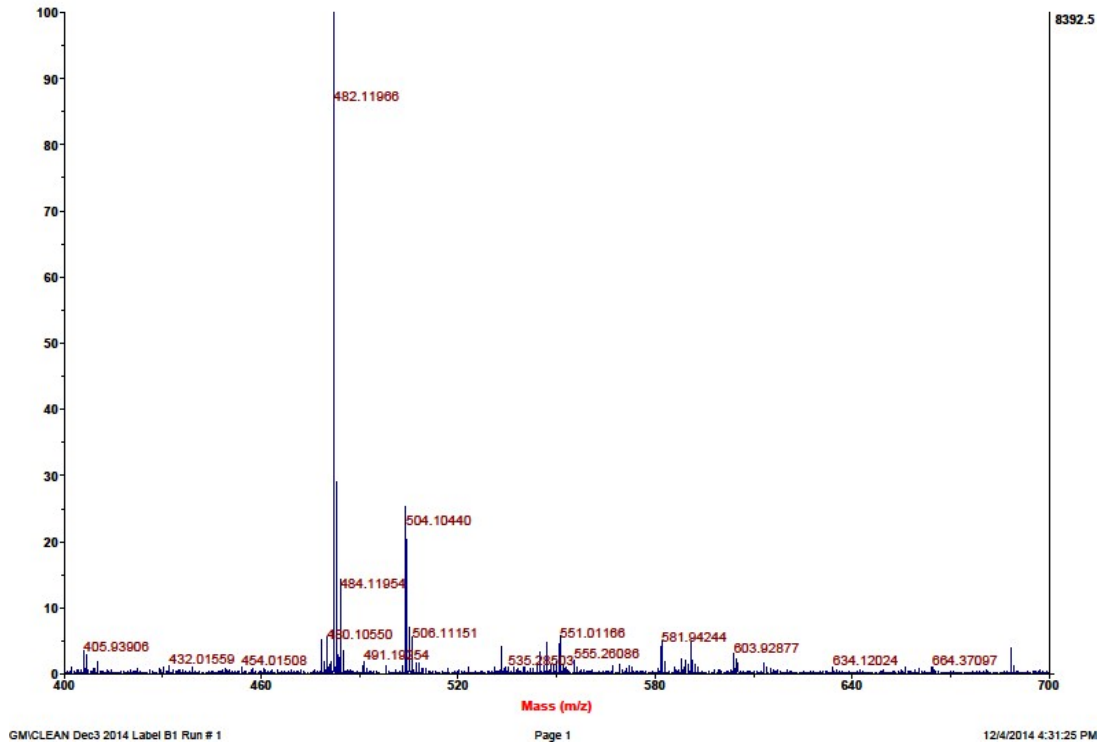

Fig.S1(c) The MS spectrum of probe.

## 2. <sup>1</sup>H NMR of N-butyl-4-amino-1,8-naphthalimide

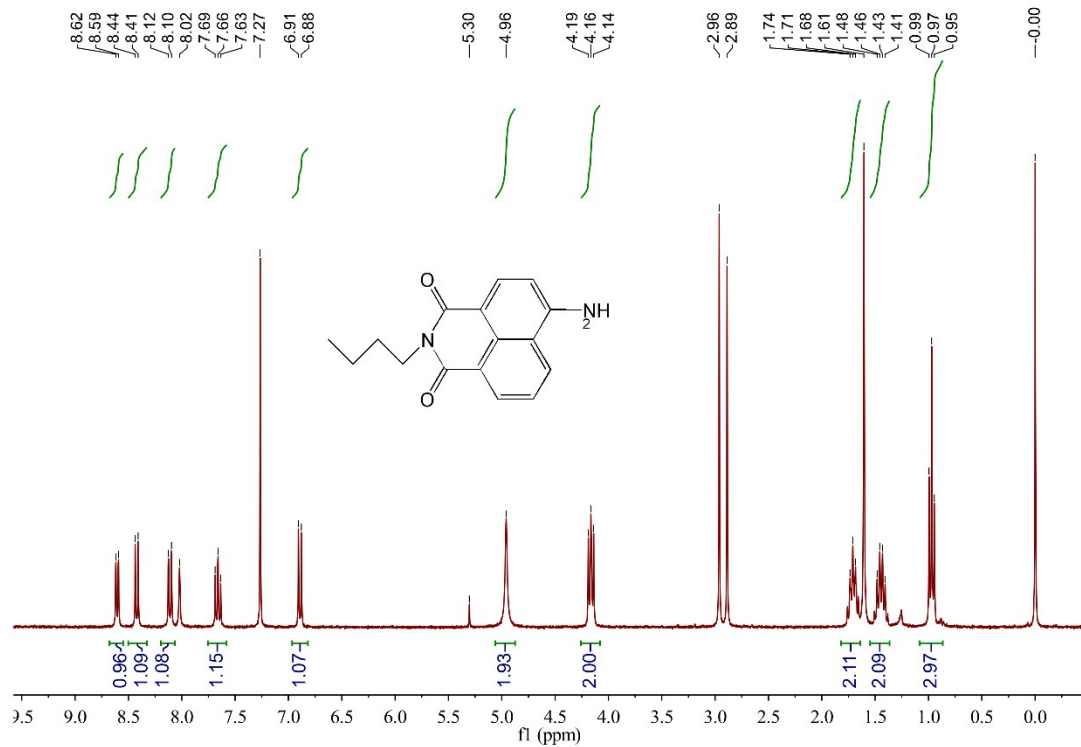

Fig.S2 The <sup>1</sup>H NMR spectrum of N-butyl-4-amino-1,8-naphthalimid

### 3. Ratiometric responses towards Cys

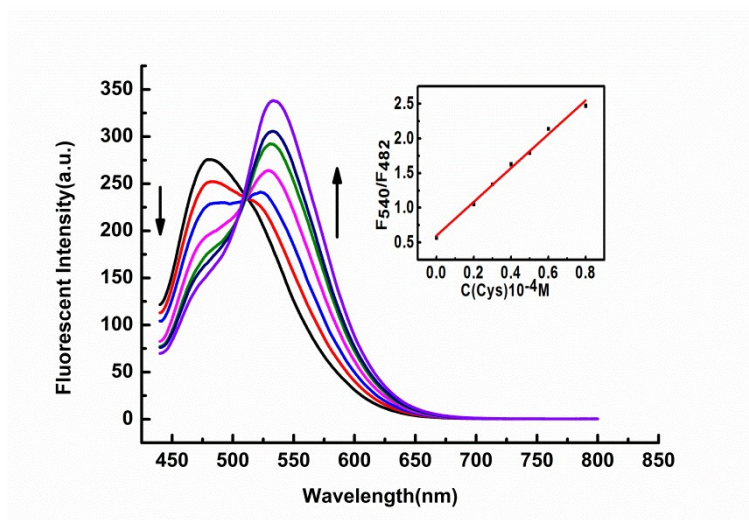

Fig.S3 The emission spectra of probe (1  $\mu\text{M}$ ) in 50 mM PBS buffer (pH 7.4, 10% DMF) with different concentrations of Cys (0, 20, 30, 40, 50, 60, 80, 90, 100  $\mu\text{M}$ ) for 90 min at 25  $^{\circ}\text{C}$ ,  $\lambda_{\text{ex}}=420$  nm. Insert is the concentration of Cys dependence of the ratiometric fluorescence signal ( $F_{540}/F_{482}$ ), the concentrations of Cys is 0-80  $\mu\text{M}$ .

### 4. Ratiometric responses towards Hcy

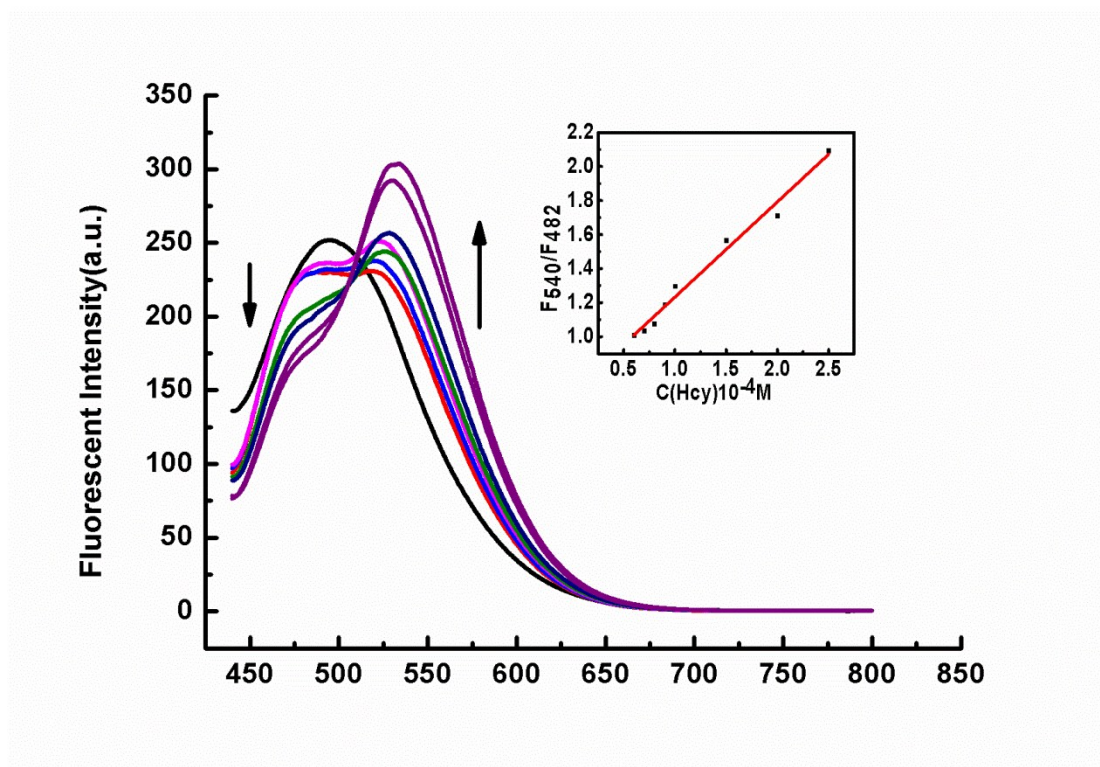

Fig.S4 The emission spectra of probe (1  $\mu\text{M}$ ) in 50 mM PBS buffer (pH 7.4, 10% DMF) with different concentrations of Hcy (0, 60, 70, 80, 90, 100, 150, 200, 250 $\mu\text{M}$ ) for 90 min at 25  $^{\circ}\text{C}$ ,  $\lambda_{\text{ex}}=420$  nm. Insert is the concentration of Hcy dependence of the ratiometric fluorescence signal ( $F_{540}/F_{482}$ ), the concentrations of Hcy is 60-250 $\mu\text{M}$

### 5. Time-dependent fluorescence spectral changes of probe with biothiols.

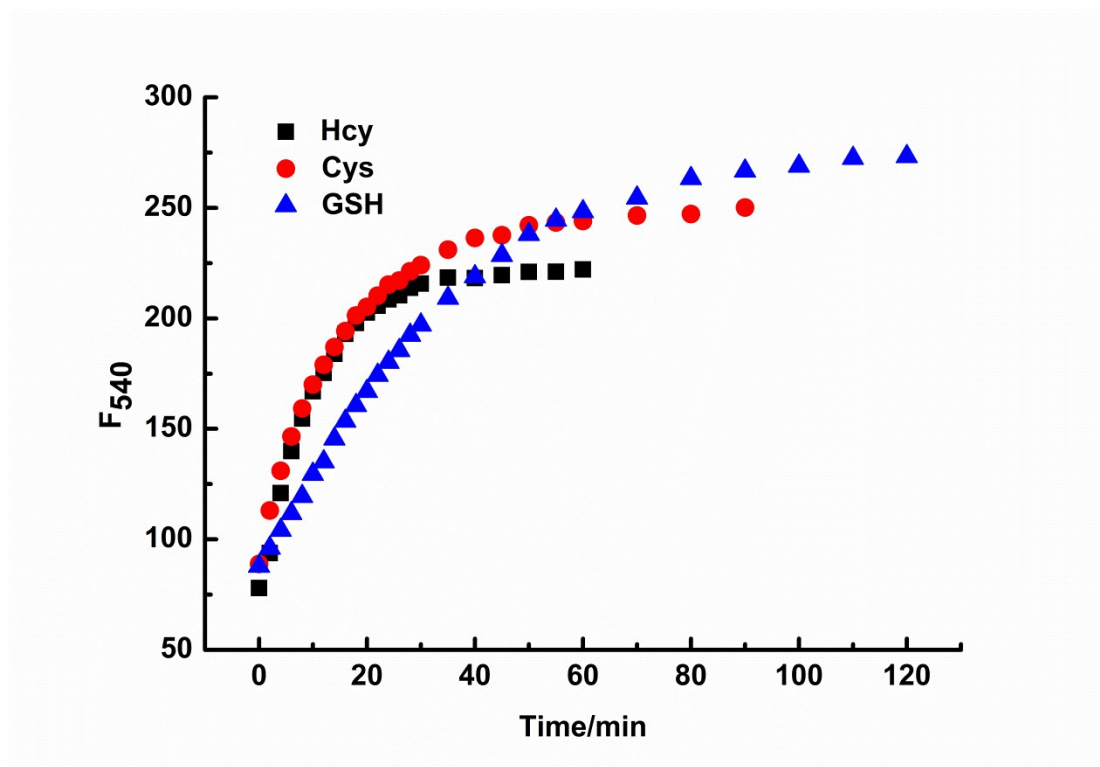

Fig.S5 Time-dependent fluorescence enhancements of probe (1  $\mu\text{M}$ ) in 50 mM PBS buffer (pH 7.4, 10% DMF) to GSH, Cys and Hcy (1 mM). ( $\lambda_{\text{ex/em}} = 420/540$  nm)

### 6. The effects of pH.

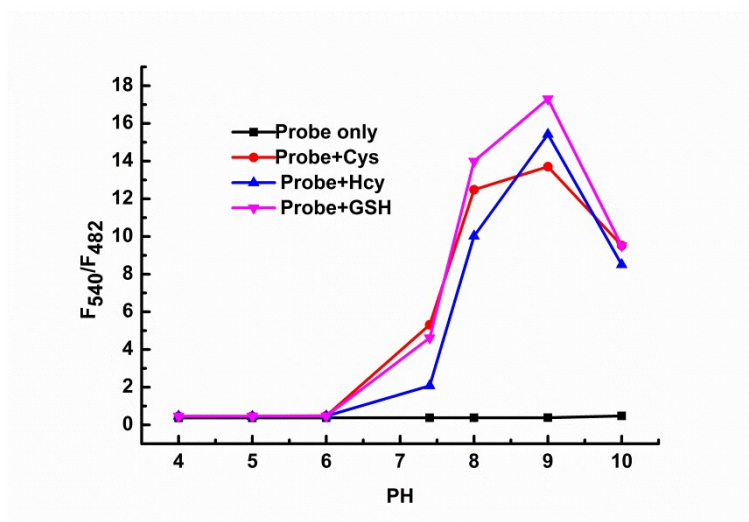

Fig.S6 pH-dependent ratiometric fluorescence changes of probe (1  $\mu$ M) in 50 mM PBS buffer (pH 7.4, 10% DMF) to GSH, Cys and Hcy (1 mM). ( $\lambda_{ex}$  = 420 nm)

## 7. Determination of quantum yield.

The quantum yield of probe 1 was determined according to the following equation:

$$\Phi_{f \text{ sample}} = \Phi_{f \text{ standard}} \times (I_{\text{sample}} / I_{\text{standard}}) \times (A_{\text{standard}} / A_{\text{sample}}) \times (n_{\text{sample}} / n_{\text{standard}})^2$$

Where  $\Phi$  is quantum yield; I is integrated area under the uncorrected emission spectra; A is absorbance at the excitation wavelength; n denotes the refractive index of the solvent. 7-hydroxycoumarin ( $\Phi_f = 0.76$ , excited at 330nm in 0.1 M pH 7.4 sodium phosphate buffer) as the standard. [1]

## 8. References

[1] K. Setsukinai, Y. Urano, K. Kikuchi, T. Higuchi, T. Nagano, J. Chem. Soc. Perkin Trans. 2, 2000, 2453–2457.
